# Supplementary material for: A Multinational, Randomized, Open-label, Treat-to-Target Trial Comparing Insulin Degludec and Insulin Glargine in Insulin-Naïve Patients with Type 2 Diabetes Mellitus
Source: Springer Nature journal article supplement (doi:10.1007/s40268-016-0134-z), 2016-04-20

## Electronic Supplementary Material

A multinational, randomized, open-label, treat-to-target trial comparing insulin degludec and insulin glargine in insulin-naïve patients with type 2 diabetes.

Authors: Pan C, Gross JL, Yang W, Lv X, Sun L, Hansen CT, Xu H, Wagner R.

Drugs R D. 2016

Corresponding author: Changyu Pan, PLA General Hospital, Department of Endocrinology, Beijing, China. Email: [panchy301@126.com](mailto:panchy301@126.com)

**Table S1** Titration algorithm.

**Table S2** Sensitivity analyses of the primary analysis, change from baseline in HbA<sub>1c</sub> (%) after 26 weeks of treatment.

**Table S3** Summary of treatment emergent adverse events (safety analysis set).

**Fig. S1** Mean insulin dose over the 26-week treatment period (full analysis set).

**Table S1** Titration algorithm.

| Mean pre-breakfast PG <sup>a</sup> |                   | Dose adjustment of IDeg or IGl <sup>a</sup> |
|------------------------------------|-------------------|---------------------------------------------|
| mmol/L                             | mg/dL             |                                             |
| < 3.1 <sup>b</sup>                 | < 56 <sup>b</sup> | Decrease by 4 U <sup>c</sup>                |
| ≤ 3.9 <sup>b</sup>                 | ≤ 70 <sup>b</sup> | Decrease by 2 U <sup>d</sup>                |
| < 5.0                              | < 90              | No adjustment                               |
| < 7.0                              | < 126             | Increase by 2 U                             |
| < 8.0                              | < 144             | Increase by 4 U                             |
| < 9.0                              | < 162             | Increase by 6 U                             |
| ≥ 9.0                              | ≥ 162             | Increase by 8 U                             |

*PG* plasma glucose, *IDeg* insulin degludec, *IGlar* insulin glargine, *U* units,

<sup>a</sup> Mean from 3 consecutive days prior to a site visit or telephone contact.

<sup>b</sup> If low PG values occurred without obvious explanation.

<sup>c</sup> For a dose of >45 U, a 10% dose reduction was recommended.

<sup>d</sup> For a dose of >45 U, a dose reduction of 5% was recommended.

The starting dose was 10 U for all subjects. Insulin dose was titrated once weekly throughout the trial based on the mean pre-breakfast self-measured plasma glucose (SMPG) from the last 3 days prior to site visits or telephone contacts. It was recommended that the titration algorithm was followed at all visits/phone contacts. However, the investigators based the decision to adjust the insulin dose on all available information, such as symptoms of hypo-/hyperglycemia, previous responses to dose adjustments as well as blood glucose measurements other than the mandatory ones. A blinded titration committee reviewed deviations weekly. The difference between the recommended dose according to the titration algorithm and the prescribed dose was close to zero for both groups suggesting a close adherence to the titration algorithm.

SMPG was measured using a blood glucose meter (Precision Xtra<sup>®</sup>/FreeStyle Optimum<sup>®</sup>; Abbott Diabetes Care Inc., Illinois, USA) with test strips calibrated to plasma values.

**Table S2** Sensitivity analyses of the primary analysis, change from baseline in HbA<sub>1c</sub> (%) after 26 weeks of treatment.

| Analysis                                 | N    |       | Estimated treatment difference<br>IDeg-IGlar<br>Mean [95% CI] |
|------------------------------------------|------|-------|---------------------------------------------------------------|
|                                          | IDeg | IGlar |                                                               |
| Per protocol <sup>a,b</sup>              | 538  | 266   | -0.05 [-0.17; 0.08]                                           |
| Simple model <sup>b,c</sup>              | 555  | 278   | -0.06 [-0.19; 0.07]                                           |
| Repeated measurements model <sup>d</sup> | 538  | 268   | -0.03 [-0.15; 0.10]                                           |

CI confidence interval, HbA<sub>1c</sub> glycosylated hemoglobin, IDeg insulin degludec, IGlar insulin glargine

<sup>a</sup> Per protocol (PP) analysis was performed on the PP set, including subjects who complied with all inclusion/exclusion criteria, who had at least 12 weeks of exposure, and who had a non-missing HbA<sub>1c</sub> at screening or randomization, and at least one non-missing HbA<sub>1c</sub> at or after 12 weeks of treatment.

<sup>b</sup> Missing values imputed using last observation carried forward method

<sup>c</sup> Change from baseline analyzed with an analysis of variance (ANOVA) including treatment as fixed factor and baseline HbA<sub>1c</sub> as covariate.

<sup>d</sup> HbA<sub>1c</sub> values available at scheduled time points after randomization were jointly analyzed using a linear mixed model with an unstructured residual covariance matrix, and with treatment, time, interaction between treatment and time, region, anti-diabetic treatment at screening and sex as fixed effects and age and baseline HbA<sub>1c</sub> as covariates.

**Table S3** Summary of treatment emergent adverse events<sup>a</sup> (safety analysis set).

|                                 | <b>IDeg OD (n=553)</b> |                 |                         | <b>IGlar OD (n=278)</b> |                 |                         |
|---------------------------------|------------------------|-----------------|-------------------------|-------------------------|-----------------|-------------------------|
|                                 | <b>N (%)</b>           | <b>Episodes</b> | <b>Rate<sup>b</sup></b> | <b>N (%)</b>            | <b>Episodes</b> | <b>Rate<sup>b</sup></b> |
| AEs                             | 293 (53.0)             | 612             | 228.3                   | 161 (57.9)              | 387             | 289.6                   |
| SAEs                            | 16 ( 2.9)              | 18              | 6.7                     | 10 ( 3.6)               | 12              | 9.0                     |
| Severity                        |                        |                 |                         |                         |                 |                         |
| Mild                            | 243 (43.9)             | 448             | 167.1                   | 140 (50.4)              | 299             | 223.8                   |
| Moderate                        | 81 (14.6)              | 148             | 55.2                    | 44 (15.8)               | 76              | 56.9                    |
| Severe                          | 16 ( 2.9)              | 16              | 6.0                     | 10 ( 3.6)               | 12              | 9.0                     |
| Related to insulin <sup>c</sup> |                        |                 |                         |                         |                 |                         |
| Probably                        | 17 ( 3.1)              | 19              | 7.1                     | 9 ( 3.2)                | 12              | 9.0                     |
| Possibly                        | 51 ( 9.2)              | 71              | 26.5                    | 24 ( 8.6)               | 32              | 23.9                    |
| Unlikely                        | 257 (46.5)             | 519             | 193.6                   | 153 (55.0)              | 342             | 255.9                   |
| Missing                         | 3 ( 0.5)               | 3               | 1.1                     | 1 ( 0.4)                | 1               | 0.7                     |
| Most frequent AEs <sup>d</sup>  |                        |                 |                         |                         |                 |                         |
| URTI                            | 60 (10.8)              | 77              | 28.7                    | 32 (11.5)               | 40              | 29.9                    |
| Nasopharyngitis                 | 41 ( 7.4)              | 49              | 18.3                    | 27 ( 9.7)               | 40              | 29.9                    |
| Injection site reactions        | 9 ( 1.6)               | 9               | 3                       | 2 ( 0.7)                | 3               | 2                       |
| Confirmed MACE <sup>e</sup>     | 4 ( 0.7)               | 4               | 1.5                     | 2 ( 0.7)                | 2               | 1.5                     |

*IDeg* insulin degludec, *IGlar* insulin glargine, *OD* once daily, *N* number of subjects with events, % proportion of subjects with events, *AE* adverse event, *SAE* serious adverse event, *URTI* upper respiratory tract infection, *MACE* major adverse cardiovascular events

<sup>a</sup> Treatment emergent adverse events are events occurring on or after the first day of exposure and no later than 7 days after the last day of treatment

<sup>b</sup> Event rate per 100 years of patient exposure

<sup>c</sup> Relationship based on Investigator's assessment

<sup>d</sup> Adverse events with a frequency  $\geq 5\%$

<sup>e</sup> Events confirmed by an external event adjudication committee

**Fig. S1**

Mean insulin dose over the 26-week treatment period (full analysis set).  
*IDeg* insulin degludec, *IGlar* insulin glargine, *U* units

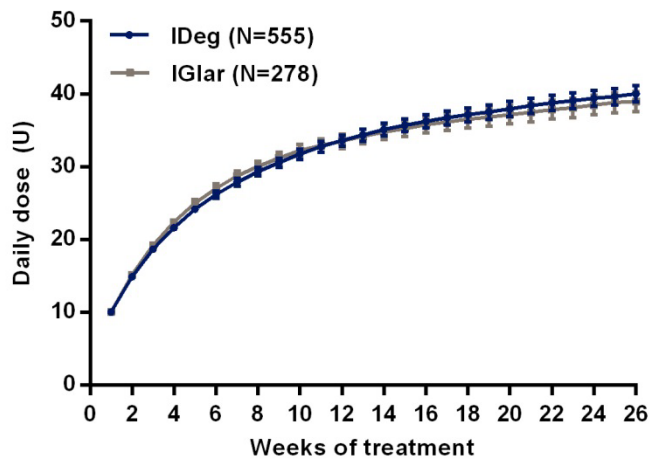

Supplement: MOESM1 [file 24125912]
